# Supplementary material
Source: PubMed Central journal article supplement (PMC8855312)
Supplement: jamaoncol-e216204-s001.pdf [file jamaoncol-e216204-s001.pdf]

## Supplementary Online Content

Lowry KP, Geuzinge HA, Stout NK, et al; Breast Working Group of the Cancer Intervention and Surveillance Modeling Network (CISNET); Breast Cancer Surveillance Consortium (BCSC); Cancer Risk Estimates Related to Susceptibility (CARRIERS) Consortium. Breast cancer screening strategies for women with *ATM*, *CHEK2*, and *PALB2* pathogenic variants: a comparative modeling analysis. *JAMA Oncol*. Published online February 17, 2022. doi:10.1001/jamaoncol.2021.6204

**eTable 1.** Age-Specific Odds Ratios for Breast Cancer Used in Base Case Analysis and Sensitivity Analyses

**eTable 2.** Specificity of Screening With Mammography Alone, MRI Alone, and Mammography Combined With MRI Stratified by Age Group and Screening Round

**eTable 3.** Incremental Screening Harms per Life Year Gained for Screening Strategies With Varying Start Age of Magnetic Resonance Imaging

**eFigure 1.** False-Positive Exams and Breast Cancer Deaths Averted for Screening Strategies for Women With Pathogenic Variants in *ATM*, *CHEK2*, and *PALB2*

**eTable 4.** Sensitivity Analysis of Screening Outcomes Assuming Higher Breast Cancer Risk

**eTable 5.** Sensitivity Analysis of Screening Outcomes Assuming Lower Breast Cancer Risk

**eFigure 2.** False-Positive Screens versus Life Years Gained for Screening Strategies for Women With Pathogenic Variants in *ATM*, *CHEK2*, and *PALB2*, Varying Breast Cancer Risk  $\pm 1$  Standard Error Based on CARRIERS Data

**eTable 6.** Sensitivity Analysis of Screening Outcomes Assuming the Lower Confidence Limit of MRI Sensitivity

**eTable 7.** Sensitivity Analysis of Screening Outcomes Assuming the Lower Confidence Limit of the MRI Specificity

**eTable 8.** Sensitivity Analysis of Screening Outcomes Assuming the Upper Confidence Limit of the MRI Specificity

**eTable 9.** Sensitivity Analysis of Screening Outcomes Using Age-Specific MRI Specificity from the Breast Cancer Surveillance Consortium

**eTable 10.** Sensitivity Analysis of Screening Outcomes Assuming the Use of Digital Breast Tomosynthesis for Mammography Screening

**eFigure 3A.** False-Positive Screens versus Life Years Gained for Screening Strategies for Women With Pathogenic Variants in *ATM* Under Varying Assumptions for Screening Specificity

**eFigure 3B.** False-Positive Screens versus Life Years Gained for Screening Strategies for Women With Pathogenic Variants in *CHEK2* Under Varying Assumptions for Screening Specificity

**eFigure 3C.** False-Positive Screens versus Life Years Gained for Screening Strategies for Women With Pathogenic Variants in *PALB2* Under Varying Assumptions for Screening Specificity

**eAppendix.** Additional Funding and Acknowledgements for Carriers

This supplementary material has been provided by the authors to give readers additional information about their work.

**eTable 1.** Age-Specific Odds Ratios for Breast Cancer Used in Base Case Analysis and Sensitivity Analyses. Lower and upper bounds were estimated by adding and subtracting one standard error from the base case.

| Age | <i>ATM</i> |      |       | <i>CHEK2</i> |      |       | <i>PALB2</i> |      |       |
|-----|------------|------|-------|--------------|------|-------|--------------|------|-------|
|     | Lower      | Base | Upper | Lower        | Base | Upper | Lower        | Base | Upper |
| 35  | 2.29       | 3.01 | 3.97  | 2.44         | 3.15 | 4.06  | 2.15         | 3.22 | 4.84  |
| 40  | 2.16       | 2.72 | 3.43  | 2.40         | 2.98 | 3.69  | 2.36         | 3.31 | 4.65  |
| 45  | 2.04       | 2.46 | 2.97  | 2.36         | 2.82 | 3.36  | 2.57         | 3.40 | 4.49  |
| 50  | 1.91       | 2.23 | 2.59  | 2.31         | 2.66 | 3.07  | 2.78         | 3.49 | 4.38  |
| 55  | 1.78       | 2.01 | 2.28  | 2.25         | 2.52 | 2.83  | 2.96         | 3.59 | 4.35  |
| 60  | 1.63       | 1.82 | 2.04  | 2.15         | 2.38 | 2.64  | 3.06         | 3.69 | 4.44  |
| 65  | 1.46       | 1.64 | 1.86  | 2.02         | 2.25 | 2.51  | 3.07         | 3.79 | 4.67  |
| 70  | 1.28       | 1.49 | 1.73  | 1.87         | 2.13 | 2.43  | 3.02         | 3.89 | 5.02  |

Odds ratios were provided from the CARRIERS consortium and estimated using logistic regression adjusted for study, first degree family history of breast cancer, race/ethnicity, age, and an interaction of age and pathogenic variant.

**eTable 2.** Specificity of Screening With Mammography Alone, MRI Alone, and Mammography Combined With MRI Stratified by Age Group and Screening Round. Data provided from the Breast Cancer Surveillance Consortium. Specificity was calculated based on 7,424 MRI and 5,671 mammography screening examinations performed for high-risk screening in women without a personal history of breast cancer at BCSC facilities from 2005 through 2020.

|         | Initial Screen |            |                | Rescreen   |            |                |
|---------|----------------|------------|----------------|------------|------------|----------------|
|         | <i>MMG</i>     | <i>MRI</i> | <i>MMG+MRI</i> | <i>MMG</i> | <i>MRI</i> | <i>MMG+MRI</i> |
| Age <50 | 59%            | 79%        | 68%            | 82%        | 92%        | 87%            |
| Age ≥50 | 70%            | 85%        | 77%            | 88%        | 95%        | 92%            |

**eTable 3.** Incremental Screening Harms per Life Year Gained for Screening Strategies With Varying Start Age of Magnetic Resonance Imaging. Incremental ratios are calculated for each strategy relative to the next least screening intensive strategy.

|            | False-Positive Screens per LYG<br>Model Average (Range) |                                   |                               | Benign Biopsies per LYG<br>Model Average (Range) |                                |                                |
|------------|---------------------------------------------------------|-----------------------------------|-------------------------------|--------------------------------------------------|--------------------------------|--------------------------------|
|            | <i>ATM</i>                                              | <i>CHEK2</i>                      | <i>PALB2</i>                  | <i>ATM</i>                                       | <i>CHEK2</i>                   | <i>PALB2</i>                   |
| MMG at 40  | 7.7<br>(7.0-8.5)                                        | 5.9<br>(5.3-6.6)                  | 3.4<br>(3.7-3.1)              | 1.0<br>(0.9-1.1)                                 | 0.8<br>(0.7-0.9)               | 0.5<br>(0.4-0.5)               |
| +MRI at 40 | 18.1<br>(17.7-18.6)                                     | 13.8<br>(13.5-14.2)               | 7.2<br>(6.7-7.6)              | 7.0<br>(6.8-7.1)                                 | 5.3<br>(5.2-5.5)               | 2.8<br>(2.6-3.0)               |
| +MRI at 35 | 15.3<br>(14.9-15.6 <sup>a</sup> )                       | 12.2<br>(12.0-12.4 <sup>a</sup> ) | 7.0<br>(6.4-7.6) <sup>a</sup> | 5.9<br>(5.8-6.0 <sup>a</sup> )                   | 4.7<br>(4.6-4.8 <sup>a</sup> ) | 2.7<br>(2.5-3.0 <sup>a</sup> ) |
| +MRI at 30 | 15.2<br>(14.9-15.5 <sup>b</sup> )                       | 14.4<br>(14.0-14.7)               | 12.8<br>(11.6-14.0)           | 5.9<br>(5.8-6.0 <sup>b</sup> )                   | 5.5<br>(5.4-5.7)               | 4.9<br>(4.5-5.4)               |
| +MRI at 25 | 57.9<br>(43.5-72.3)                                     | 54.3<br>(41.2-67.3)               | 47.0<br>(32.6-61.3)           | 22.2<br>(16.7-27.7)                              | 20.8<br>(15.8-25.7)            | 18.0<br>(12.5-23.4)            |

MMG, mammography; MRI, magnetic resonance imaging; LYG, life years gained

<sup>a</sup>Starting MRI at 40 is less efficient than MRI at 35; incremental ratios for MRI at 35 are calculated relative to Mammography at 40 (without MRI)

<sup>b</sup>Starting MRI at 35 or 40 is less efficient than MRI at 30; incremental ratios for MRI at 30 are calculated relative to Mammography at 40 (without MRI)

**eFigure 1.** False-Positive Exams and Breast Cancer (BC) Deaths Averted for Screening Strategies for Women With Pathogenic Variants in *ATM* (panel A), *CHEK2* (panel B), and *PALB2* (panel C). Results are shown as model averages of cumulative lifetime outcomes per 1000 women screened across Model E and Model W-H. MMG=Mammography; MRI=Magnetic resonance imaging. In all strategies, MMG is performed annually from ages 40-74; MRI start age varies by strategy.

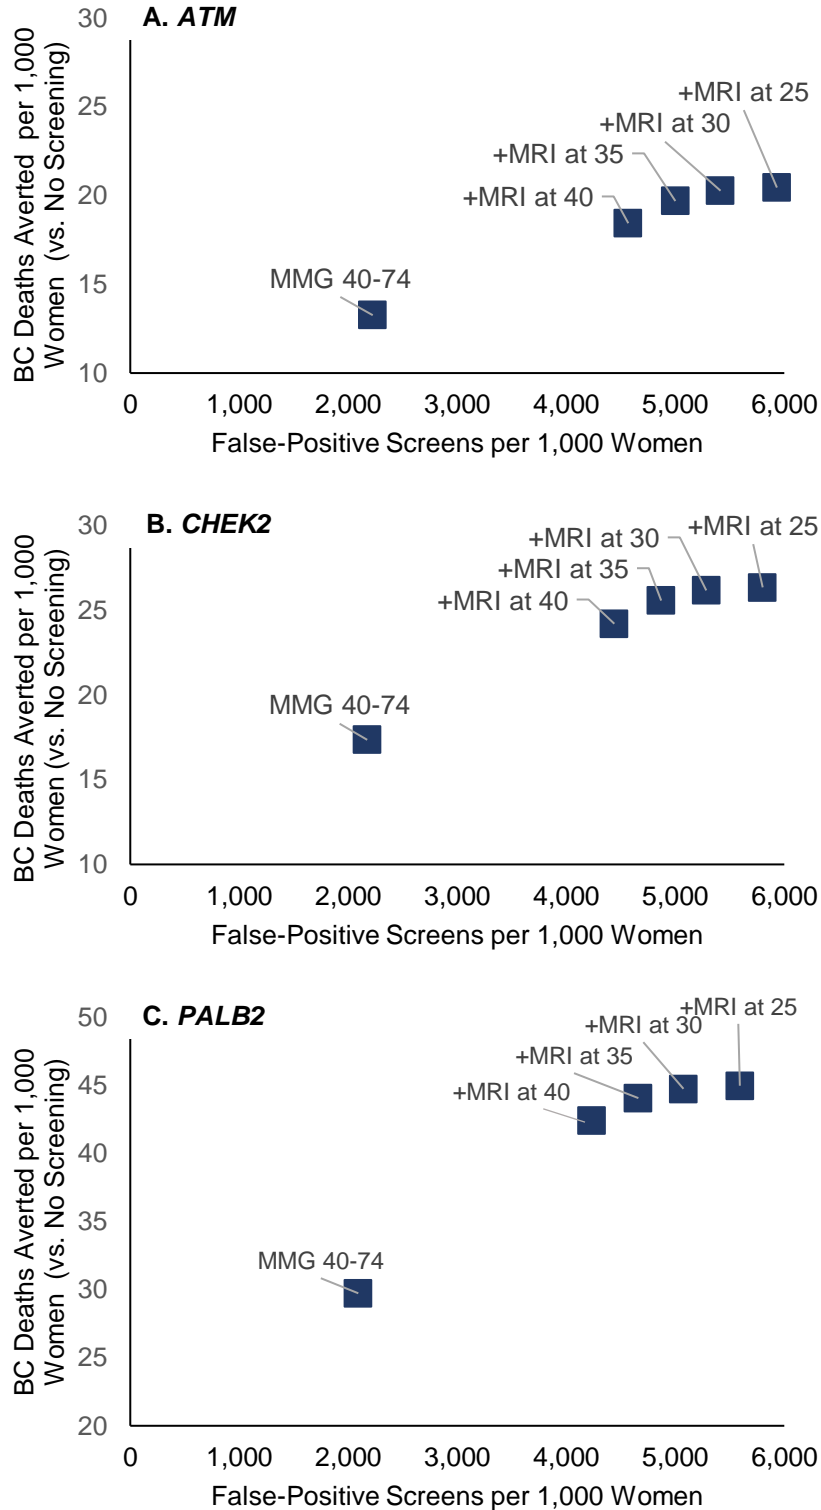

**eTable 4.** Sensitivity Analysis of Screening Outcomes Assuming Higher Breast Cancer Risk. Age-specific risk estimates from CARRIERS were increased by one standard error (see eTable 1). Results are shown as model averages (ranges) of cumulative lifetime outcomes per 1,000 women screened across Model E and Model W-H.

|            | <i>Breast Cancer Mortality Reduction (%)</i> |                     |                     | <i>Life Years Gained</i>     |                  |                     | <i>Deaths Averted</i>        |                     |                     |
|------------|----------------------------------------------|---------------------|---------------------|------------------------------|------------------|---------------------|------------------------------|---------------------|---------------------|
|            | <i>Model Average (Range)</i>                 |                     |                     | <i>Model Average (Range)</i> |                  |                     | <i>Model Average (Range)</i> |                     |                     |
|            | <i>ATM</i>                                   | <i>CHEK2</i>        | <i>PALB2</i>        | <i>ATM</i>                   | <i>CHEK2</i>     | <i>PALB2</i>        | <i>ATM</i>                   | <i>CHEK2</i>        | <i>PALB2</i>        |
| MMG at 40  | 37.7<br>(36.9-38.5)                          | 38.0<br>(37.4-38.5) | 37.6<br>(35.1-40.2) | 339<br>(303-375)             | 418<br>(377-459) | 765<br>(692-837)    | 15.5<br>(10.3-20.6)          | 19.4<br>(13.3-25.5) | 36.4<br>(27.6-45.2) |
| +MRI at 40 | 52.7<br>(51.8-53.5)                          | 53.1<br>(52.7-53.5) | 53.8<br>(51.9-55.8) | 490<br>(448-531)             | 604<br>(560-649) | 1131<br>(1079-1183) | 21.6<br>(14.4-28.7)          | 27.1<br>(18.7-35.4) | 51.8<br>(40.8-62.8) |
| +MRI at 35 | 57.0<br>(57.3-56.7)                          | 56.8<br>(56.3-57.3) | 56.2<br>(55.1-57.4) | 557<br>(524-592)             | 678<br>(641-714) | 1224<br>(1197-1251) | 23.0<br>(16.0-30.4)          | 28.8<br>(20.3-37.3) | 53.9<br>(43.3-64.6) |
| +MRI at 30 | 59.0<br>(58.0-60.0)                          | 58.6<br>(57.6-59.6) | 57.3<br>(56.6-58.0) | 593<br>(565-622)             | 717<br>(683-750) | 1271<br>(1257-1285) | 23.9<br>(16.7-31.1)          | 29.6<br>(21.1-38.2) | 54.9<br>(44.5-65.4) |
| +MRI at 25 | 59.7<br>(58.4-60.9)                          | 59.1<br>(57.9-60.3) | 57.7<br>(57.1-58.2) | 606<br>(579-633)             | 729<br>(698-760) | 1287<br>(1279-1296) | 24.2<br>(17.0-31.3)          | 29.9<br>(21.4-38.3) | 55.2<br>(44.9-65.6) |

MMG, mammography; MRI, magnetic resonance imaging.

**eTable 5.** Sensitivity Analysis of Screening Outcomes Assuming Lower Breast Cancer Risk. Age-specific risk estimates from CARRIERS were decreased by one standard error (see eTable 1). Results are shown as model averages (ranges) of cumulative lifetime outcomes per 1,000 women screened across Model E and Model W-H.

|            | <i>Breast Cancer Mortality Reduction (%)</i> |                     |                     | <i>Life Years Gained</i>     |                  |                  | <i>Deaths Averted</i>        |                     |                     |
|------------|----------------------------------------------|---------------------|---------------------|------------------------------|------------------|------------------|------------------------------|---------------------|---------------------|
|            | <i>Model Average (Range)</i>                 |                     |                     | <i>Model Average (Range)</i> |                  |                  | <i>Model Average (Range)</i> |                     |                     |
|            | <i>ATM</i>                                   | <i>CHEK2</i>        | <i>PALB2</i>        | <i>ATM</i>                   | <i>CHEK2</i>     | <i>PALB2</i>     | <i>ATM</i>                   | <i>CHEK2</i>        | <i>PALB2</i>        |
| MMG at 40  | 39.0<br>(38.4-39.7)                          | 38.4<br>(38.3-38.6) | 36.3<br>(35.1-37.5) | 248<br>(229-266)             | 325<br>(290-360) | 521<br>(454-589) | 11.2<br>(7.8-14.7)           | 15.4<br>(10.3-20.5) | 25.3<br>(17.7-32.8) |
| +MRI at 40 | 54.1<br>(53.7-54.5)                          | 53.8<br>(53.7-54.0) | 52.1<br>(51.7-52.5) | 355<br>(338-372)             | 470<br>(430-510) | 775<br>(709-840) | 15.6<br>(10.9-20.2)          | 21.5<br>(14.4-28.6) | 36.1<br>(26.1-46.0) |
| +MRI at 35 | 57.8<br>(57.4-58.2)                          | 56.8<br>(56.1-57.6) | 54.0<br>(53.8-54.1) | 397<br>(383-410)             | 516<br>(481-551) | 824<br>(766-883) | 16.6<br>(11.9-21.3)          | 22.6<br>(15.4-29.8) | 37.2<br>(27.3-47.1) |
| +MRI at 30 | 59.5<br>(58.8-60.3)                          | 58.2<br>(57.1-59.3) | 54.7<br>(54.2-55.1) | 419<br>(406-431)             | 539<br>(506-573) | 846<br>(792-901) | 17.0<br>(12.3-21.8)          | 23.1<br>(15.9-30.3) | 37.6<br>(27.8-47.5) |
| +MRI at 25 | 60.1<br>(59.1-61.0)                          | 58.6<br>(57.3-59.9) | 54.9<br>(54.4-55.4) | 426<br>(415-437)             | 547<br>(515-579) | 854<br>(802-907) | 17.2<br>(12.4-21.9)          | 23.2<br>(16.1-30.4) | 37.8<br>(28.0-47.6) |

MMG, mammography; MRI, magnetic resonance imaging.



**eFigure 2.** False-Positive Screens Versus Life Years Gained for Screening Strategies for Women With Pathogenic Variants in *ATM* (panel A), *CHEK2* (panel B), and *PALB2* (panel C), Varying Breast Cancer Risk  $\pm 1$  Standard Error Based on CARRIERS Data. Results are shown as model averages of cumulative lifetime outcomes per 1000 women screened across Model E and Model W-H. MMG=Mammography; MRI=Magnetic resonance imaging. In all strategies, MMG is performed annually from ages 40-74; MRI varies in start age by strategy. MMG is performed annually from ages 40-74; MRI varies in start age by strategy.

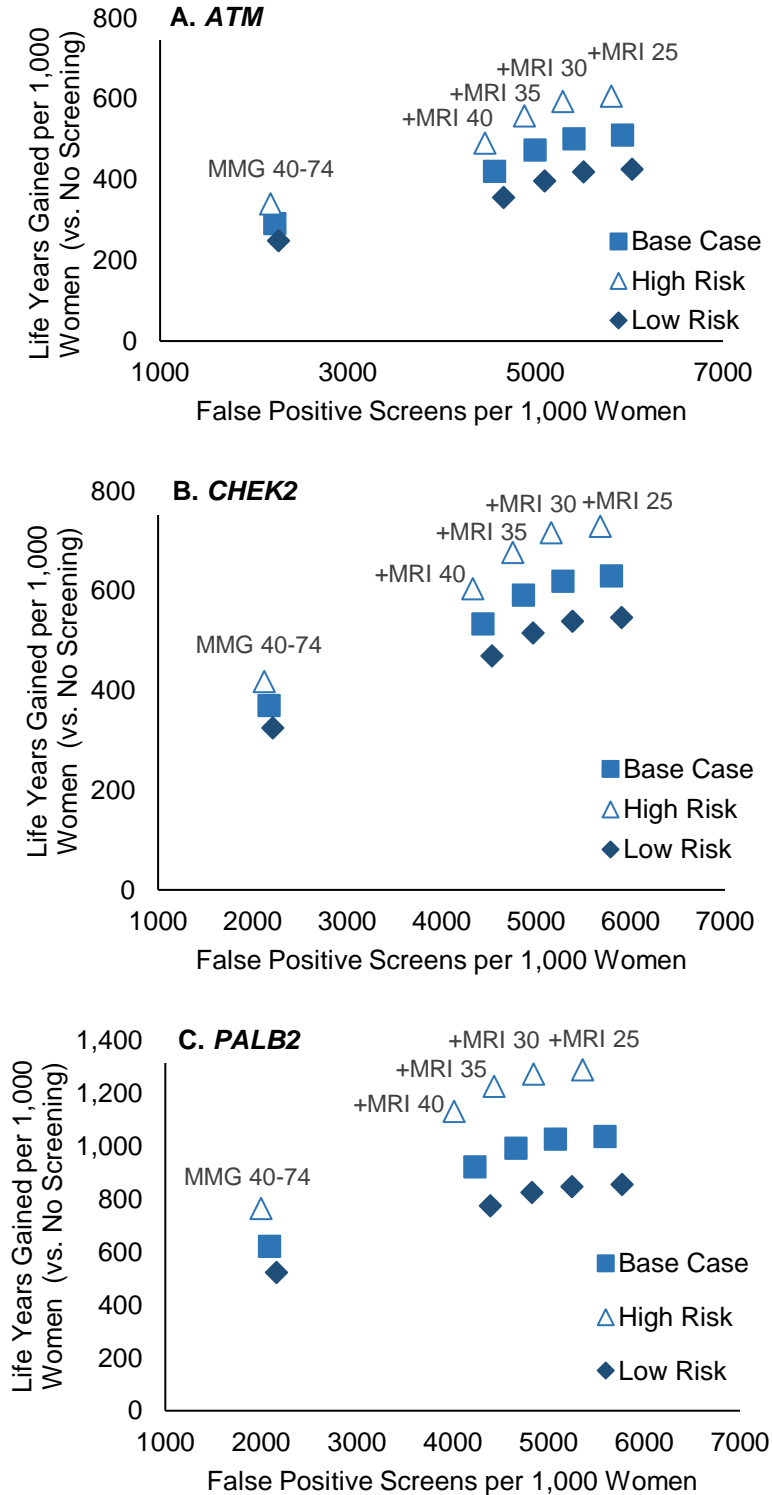

**eTable 6.** Sensitivity Analysis of Screening Outcomes Assuming the Lower Confidence Limit of MRI Sensitivity. Results are shown as model averages (ranges) of cumulative lifetime outcomes per 1,000 women screened across Model E and Model W-H.

|            | <i>Breast Cancer Mortality Reduction (%)</i> |                     |                     | <i>Life Years Gained</i>     |                  |                   | <i>Deaths Averted</i>        |                     |                     |
|------------|----------------------------------------------|---------------------|---------------------|------------------------------|------------------|-------------------|------------------------------|---------------------|---------------------|
|            | <i>Model Average (Range)</i>                 |                     |                     | <i>Model Average (Range)</i> |                  |                   | <i>Model Average (Range)</i> |                     |                     |
|            | <i>ATM</i>                                   | <i>CHEK2</i>        | <i>PALB2</i>        | <i>ATM</i>                   | <i>CHEK2</i>     | <i>PALB2</i>      | <i>ATM</i>                   | <i>CHEK2</i>        | <i>PALB2</i>        |
| MMG at 40  | 37.3<br>(36.9-37.8)                          | 37.1<br>(36.3-38.0) | 35.2<br>(34.6-35.7) | 281<br>(263-299)             | 356<br>(330-381) | 599<br>(559-639)  | 12.7<br>(9.0-16.5)           | 16.6<br>(11.6-21.6) | 28.5<br>(22.0-35.1) |
| +MRI at 40 | 50.5<br>(48.6-53.2)                          | 50.4<br>(49.0-51.8) | 49.0<br>(46.8-51.1) | 393<br>(351-434)             | 498<br>(442-553) | 854<br>(781-927)  | 17.5<br>(11.5-23.5)          | 22.9<br>(15.0-30.8) | 39.9<br>(29.7-50.1) |
| +MRI at 35 | 53.9<br>(52.9-54.8)                          | 53.3<br>(52.7-54.0) | 50.8<br>(49.1-52.5) | 437<br>(400-474)             | 548<br>(497-599) | 915<br>(849-981)  | 18.6<br>(12.5-24.6)          | 24.1<br>(16.2-32.1) | 41.4<br>(31.2-51.6) |
| +MRI at 30 | 55.5<br>(54.9-56.0)                          | 54.6<br>(54.3-54.9) | 51.6<br>(50.1-53.1) | 462<br>(425-498)             | 573<br>(523-622) | 942<br>(880-1004) | 19.1<br>(13.0-25.1)          | 24.7<br>(16.7-32.7) | 42.0<br>(31.8-52.1) |
| +MRI at 25 | 56.0<br>(55.6-56.5)                          | 55.0<br>(54.8-55.1) | 51.9<br>(50.5-53.3) | 470<br>(435-505)             | 581<br>(533-629) | 953<br>(892-1013) | 19.3<br>(13.2-25.3)          | 24.8<br>(16.8-32.8) | 42.2<br>(32.0-52.3) |

MMG, mammography; MRI, magnetic resonance imaging.

**eTable 7.** Sensitivity Analysis of Screening Outcomes Assuming the Lower Confidence Limit of the MRI Specificity. Results are shown as model averages (ranges) of cumulative lifetime outcomes per 1,000 women screened across Model E and Model W-H.

|            | Breast Cancer<br>Mortality Reduction (%) |                     |                     | Life Years Gained |                  |                     | False-Positive Screens |                     |                     | Benign Biopsies     |                     |                     |
|------------|------------------------------------------|---------------------|---------------------|-------------------|------------------|---------------------|------------------------|---------------------|---------------------|---------------------|---------------------|---------------------|
|            | <i>ATM</i>                               | <i>CHEK2</i>        | <i>PALB2</i>        | <i>ATM</i>        | <i>CHEK2</i>     | <i>PALB2</i>        | <i>ATM</i>             | <i>CHEK2</i>        | <i>PALB2</i>        | <i>ATM</i>          | <i>CHEK2</i>        | <i>PALB2</i>        |
| MMG at 40  | 38.5<br>(37.8-39.2)                      | 38.4<br>(38.0-38.8) | 36.4<br>(34.6-38.2) | 291<br>(263-319)  | 370<br>(330-409) | 621<br>(559-684)    | 2224<br>(2222-2227)    | 2174<br>(2172-2175) | 2092<br>(2085-2099) | 296<br>(296-297)    | 290<br>(290-290)    | 279<br>(278-280)    |
| +MRI at 40 | 53.6<br>(52.9-54.3)                      | 53.6<br>(53.3-53.9) | 52.3<br>(51.4-53.1) | 420<br>(388-452)  | 533<br>(489-577) | 921<br>(876-967)    | 4772<br>(4757-4787)    | 4638<br>(4636-4640) | 4421<br>(4401-4441) | 1249<br>(1245-1253) | 1214<br>(1213-1215) | 1157<br>(1152-1163) |
| +MRI at 35 | 57.6<br>(57.2-58.0)                      | 57.0<br>(56.3-57.7) | 54.4<br>(54.2-54.7) | 473<br>(447-498)  | 591<br>(555-627) | 992<br>(959-1025)   | 5232<br>(5209-5255)    | 5096<br>(5086-5106) | 4878<br>(4850-4905) | 1432<br>(1425-1438) | 1396<br>(1393-1399) | 1339<br>(1332-1347) |
| +MRI at 30 | 59.5<br>(58.5-60.4)                      | 58.4<br>(57.2-59.6) | 55.4<br>(55.3-55.4) | 501<br>(478-523)  | 620<br>(587-652) | 1025<br>(998-1051)  | 5673<br>(5649-5696)    | 5536<br>(5499-5573) | 5318<br>(5298-5337) | 1601<br>(1589-1613) | 1565<br>(1550-1581) | 1508<br>(1498-1519) |
| +MRI at 25 | 60.2<br>(58.9-61.2)                      | 58.9<br>(57.5-60.3) | 55.7<br>(55.5-55.8) | 510<br>(489-531)  | 630<br>(599-661) | 1037<br>(1013-1061) | 6223<br>(6196-6249)    | 6086<br>(6073-6100) | 5867<br>(5837-5898) | 1811<br>(1819-1804) | 1776<br>(1772-1780) | 1719<br>(1710-1727) |

MMG, mammography; MRI, magnetic resonance imaging.

**eTable 8.** Sensitivity Analysis of Screening Outcomes of Screening Strategies Assuming the Upper Confidence Limit of the MRI Specificity. Results are shown as model averages (ranges) of cumulative lifetime outcomes per 1,000 women screened across Model E and Model W-H.

|            | Breast Cancer<br>Mortality Reduction (%) |                     |                     | Life Years Gained |                  |                      | False-Positive Screens |                     |                     | Benign Biopsies     |                     |                     |
|------------|------------------------------------------|---------------------|---------------------|-------------------|------------------|----------------------|------------------------|---------------------|---------------------|---------------------|---------------------|---------------------|
|            | <i>ATM</i>                               | <i>CHEK2</i>        | <i>PALB2</i>        | <i>ATM</i>        | <i>CHEK2</i>     | <i>PALB2</i>         | <i>ATM</i>             | <i>CHEK2</i>        | <i>PALB2</i>        | <i>ATM</i>          | <i>CHEK2</i>        | <i>PALB2</i>        |
| MMG at 40  | 38.5<br>(37.8-39.2)                      | 38.4<br>(38.0-38.8) | 36.4<br>(34.6-38.2) | 291<br>(263-319)  | 370<br>(330-409) | 621<br>(559-684)     | 2224<br>(2222-2227)    | 2174<br>(2172-2175) | 2092<br>(2085-2099) | 296<br>(196-197)    | 290<br>(290-290)    | 279<br>(178-280)    |
| +MRI at 40 | 53.6<br>(52.9-54.3)                      | 53.6<br>(53.3-53.9) | 52.3<br>(51.4-53.1) | 420<br>(388-452)  | 533<br>(489-577) | 921<br>(876-967)     | 4367<br>(4353-4380)    | 4244<br>(4242-4246) | 4045<br>(4027-4064) | 1141<br>(1138-1145) | 1110<br>(1109-1110) | 1058<br>(1053-1063) |
| +MRI at 35 | 57.6<br>(57.2-58.0)                      | 57.0<br>(56.3-57.7) | 54.4<br>(54.2-54.7) | 473<br>(447-498)  | 591<br>(555-627) | 992<br>(959-1,025)   | 4773<br>(4752-4794)    | 4649<br>(4640-4658) | 4449<br>(4424-4474) | 1303<br>(1298-1309) | 1271<br>(1268-1274) | 1219<br>(1212-1226) |
| +MRI at 30 | 59.5<br>(58.5-60.4)                      | 58.4<br>(57.2-59.6) | 55.4<br>(55.3-55.4) | 501<br>(478-523)  | 620<br>(587-652) | 1025<br>(998-1051)   | 5165<br>(5145-5186)    | 5040<br>(5008-5073) | 4841<br>(4824-4858) | 1454<br>(1444-1465) | 1422<br>(1408-1435) | 1370<br>(1361-1379) |
| +MRI at 25 | 60.2<br>(58.9-61.2)                      | 58.9<br>(57.5-60.3) | 55.7<br>(55.5-55.8) | 510<br>(489-531)  | 630<br>(599-661) | 1,037<br>(1013-1061) | 5655<br>(5631-5680)    | 5531<br>(5519-5543) | 5331<br>(5303-5358) | 1642<br>(1635-1649) | 1609<br>(1606-1613) | 1557<br>(1550-1565) |

MMG, mammography; MRI, magnetic resonance imaging.

**eTable 9.** Sensitivity Analysis of Screening Outcomes Using Age-Specific MRI Specificity from the Breast Cancer Surveillance Consortium. Results are shown as model averages (ranges) of cumulative lifetime outcomes per 1,000 women screened across Model E and Model W-H.

|            | Breast Cancer Mortality Reduction (%) |                     |                     | Life Years Gained |                  |                     | False-Positive Screens |                     |                     | Benign Biopsies     |                     |                     |
|------------|---------------------------------------|---------------------|---------------------|-------------------|------------------|---------------------|------------------------|---------------------|---------------------|---------------------|---------------------|---------------------|
|            | <i>ATM</i>                            | <i>CHEK2</i>        | <i>PALB2</i>        | <i>ATM</i>        | <i>CHEK2</i>     | <i>PALB2</i>        | <i>ATM</i>             | <i>CHEK2</i>        | <i>PALB2</i>        | <i>ATM</i>          | <i>CHEK2</i>        | <i>PALB2</i>        |
| MMG at 40  | 38.5<br>(37.8-39.2)                   | 38.4<br>(38.0-38.8) | 36.4<br>(34.6-38.2) | 291<br>(263-319)  | 370<br>(330-409) | 621<br>(559-684)    | 1871<br>(1867-1875)    | 1837<br>(1835-1838) | 1781<br>(1773-1788) | 256<br>(256-257)    | 252<br>(251-252)    | 244<br>(243-245)    |
| +MRI at 40 | 53.6<br>(52.9-54.3)                   | 53.6<br>(53.3-53.9) | 52.3<br>(51.4-53.1) | 420<br>(388-452)  | 533<br>(489-577) | 921<br>(876-967)    | 4225<br>(4209-4241)    | 4124<br>(411-4131)  | 3960<br>(3938-3981) | 1108<br>(1104-1112) | 1082<br>(1080-1084) | 1039<br>(1033-1045) |
| +MRI at 35 | 57.6<br>(57.2-58.0)                   | 57.0<br>(56.3-57.7) | 54.4<br>(54.2-54.7) | 473<br>(447-498)  | 591<br>(555-627) | 992<br>(959-1025)   | 4805<br>(4781-4828)    | 4702<br>(4687-4716) | 4537<br>(4508-4565) | 1344<br>(1337-1351) | 1317<br>(1313-1321) | 1274<br>(1266-1282) |
| +MRI at 30 | 59.5<br>(58.5-60.4)                   | 58.4<br>(57.2-59.6) | 55.4<br>(55.3-55.4) | 501<br>(478-523)  | 620<br>(587-652) | 1025<br>(998-1051)  | 5375<br>(5338-5412)    | 5271<br>(5224-5317) | 5106<br>(5073-5138) | 1563<br>(1546-1580) | 1536<br>(1517-1555) | 1493<br>(1477-1508) |
| +MRI at 25 | 60.2<br>(58.9-61.2)                   | 58.9<br>(57.5-60.3) | 55.7<br>(55.5-55.8) | 510<br>(489-531)  | 630<br>(599-661) | 1037<br>(1013-1061) | 6082<br>(6055-6109)    | 5978<br>(5960-5996) | 5812<br>(5781-5844) | 1834<br>(1826-1841) | 1807<br>(1801-1812) | 1764<br>(1755-1772) |

MMG, mammography; MRI, magnetic resonance imaging.

**eTable 10.** Sensitivity Analysis of Screening Outcomes Assuming the Use of Digital Breast Tomosynthesis for Mammography Screening. Results are shown as model averages (ranges) of cumulative lifetime outcomes per 1,000 women screened across Model E and Model W-H.

|            | Breast Cancer Mortality Reduction (%) |                     |                     | Life Years Gained |                  |                     | False-Positive Screens |                     |                     | Benign Biopsies     |                     |                     |
|------------|---------------------------------------|---------------------|---------------------|-------------------|------------------|---------------------|------------------------|---------------------|---------------------|---------------------|---------------------|---------------------|
|            | <i>ATM</i>                            | <i>CHEK2</i>        | <i>PALB2</i>        | <i>ATM</i>        | <i>CHEK2</i>     | <i>PALB2</i>        | <i>ATM</i>             | <i>CHEK2</i>        | <i>PALB2</i>        | <i>ATM</i>          | <i>CHEK2</i>        | <i>PALB2</i>        |
| MMG at 40  | 38.5<br>(37.8-39.2)                   | 38.4<br>(38.0-38.8) | 36.4<br>(34.6-38.2) | 291<br>(263-319)  | 370<br>(330-409) | 621<br>(559-684)    | 1766<br>(1764-1768)    | 1726<br>(1725-1727) | 1661<br>(1656-1667) | 237<br>(236-237)    | 232<br>(231-232)    | 223<br>(222-224)    |
| +MRI at 40 | 53.6<br>(52.9-54.3)                   | 53.6<br>(53.3-53.9) | 52.3<br>(51.4-53.1) | 420<br>(388-452)  | 533<br>(489-577) | 921<br>(876-967)    | 4263<br>(4250-4277)    | 4144<br>(4142-4146) | 3950<br>(3932-3967) | 1115<br>(1111-1118) | 1083<br>(1083-1084) | 1033<br>(1028-1038) |
| +MRI at 35 | 57.6<br>(57.2-58.0)                   | 57.0<br>(56.3-57.7) | 54.4<br>(54.2-54.7) | 473<br>(447-498)  | 591<br>(555-627) | 992<br>(959-1025)   | 4827<br>(4681-4722)    | 4580<br>(4571-4589) | 4385<br>(4360-4410) | 1288<br>(1283-1294) | 1257<br>(1254-1259) | 1206<br>(1199-1213) |
| +MRI at 30 | 59.5<br>(58.5-60.4)                   | 58.4<br>(57.2-59.6) | 55.4<br>(55.3-55.4) | 501<br>(478-523)  | 620<br>(587-652) | 1025<br>(998-1051)  | 5411<br>(5093-5140)    | 4995<br>(4959-5030) | 4800<br>(4780-4819) | 1448<br>(1437-1459) | 1416<br>(1402-1431) | 1365<br>(1355-1376) |
| +MRI at 25 | 60.2<br>(58.9-61.2)                   | 58.9<br>(57.5-60.3) | 55.7<br>(55.5-55.8) | 510<br>(489-531)  | 630<br>(599-661) | 1037<br>(1013-1061) | 5634<br>(5610-5658)    | 5513<br>(5525-5500) | 5317<br>(5290-5344) | 1646<br>(1639-1653) | 1614<br>(1611-1688) | 1563<br>(1556-1571) |

MMG, mammography; MRI, magnetic resonance imaging

**eFigure 3A.** False-Positive Screens Versus Life Years Gained for Screening Strategies for Women With Pathogenic Variants in *ATM* Under Varying Assumptions for Screening Specificity. In the base case, screening specificity estimates were based on published data from the Ontario Breast Screening Program (OBSP). MRI specificity was varied across the 95% CI. Specificity estimates from the Breast Cancer Surveillance Consortium (BCSC) stratified by age group and screening round were also considered. Improved mammography specificity due to digital breast tomosynthesis (DBT) was estimated based on published data. Results are shown as model averages of cumulative lifetime outcomes per 1000 women screened across Model E and Model W-H. MMG=Mammography; MRI=Magnetic resonance imaging. In all strategies, MMG is performed annually from ages 40-74; MRI varies in start age by strategy.

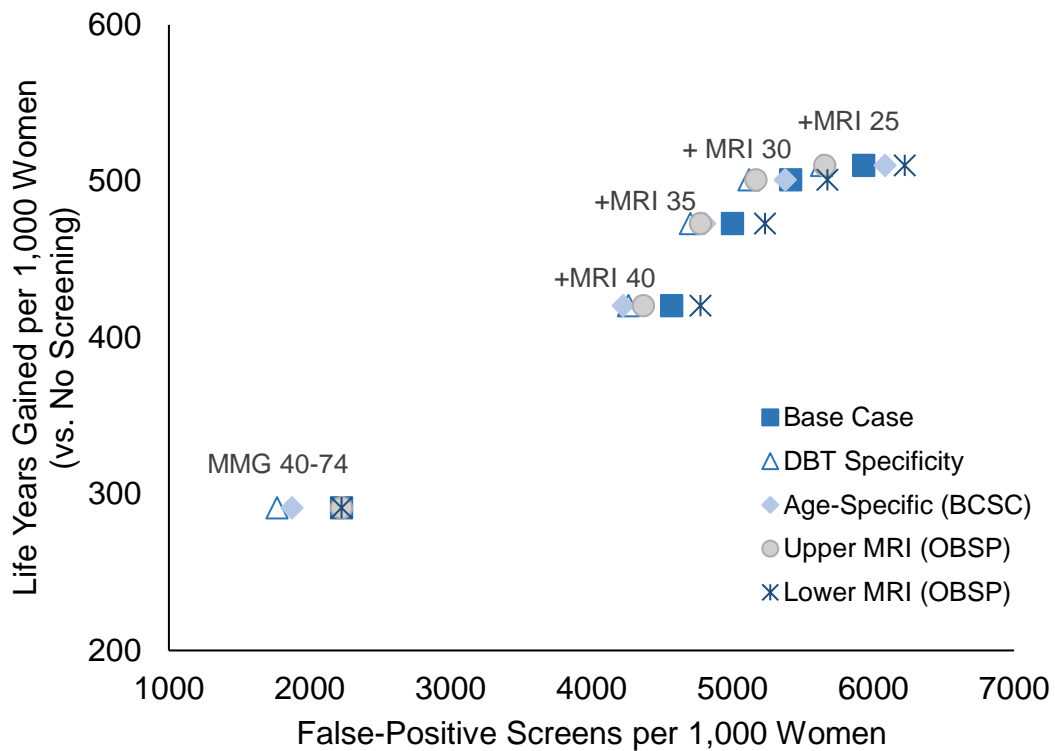

**eFigure 3B.** False-Positive Screens Versus Life Years Gained for Screening Strategies for Women With Pathogenic Variants in *CHEK2* Under Varying Assumptions for Screening Specificity. In the base case, screening specificity estimates were based on published data from the Ontario Breast Screening Program (OBSP). MRI specificity was varied across the 95% CI. Specificity estimates from the Breast Cancer Surveillance Consortium (BCSC) stratified by age group and screening round were also considered. Improved mammography specificity due to digital breast tomosynthesis (DBT) was estimated based on published data. Results are shown as model averages of cumulative lifetime outcomes per 1000 women screened across Model E and Model W-H. MMG=Mammography; MRI=Magnetic resonance imaging. In all strategies, MMG is performed annually from ages 40-74; MRI varies in start age by strategy.

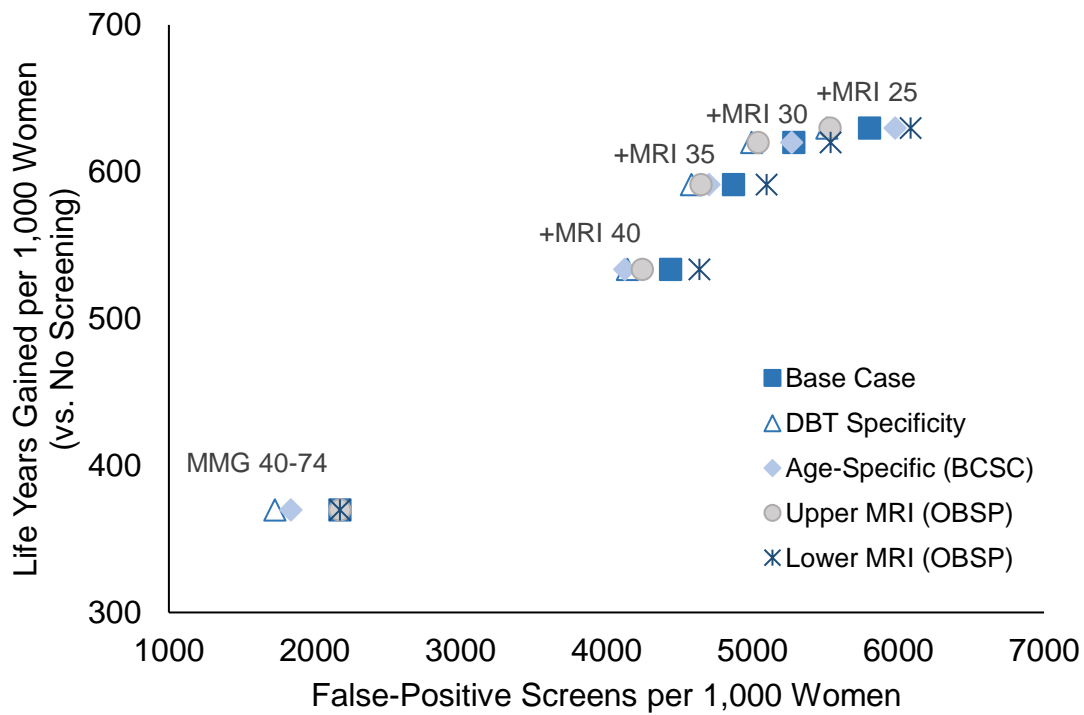



**eFigure 3C.** False-Positive Screens Versus Life Years Gained for Screening Strategies for Women With Pathogenic Variants in *PALB2* Under Varying Assumptions for Screening Specificity. In the base case, screening specificity estimates were based on published data from the Ontario Breast Screening Program (OBSP). MRI specificity was varied across the 95% CI. Specificity estimates from the Breast Cancer Surveillance Consortium (BCSC) stratified by age group and screening round were also considered. Improved mammography specificity due to digital breast tomosynthesis (DBT) was estimated based on published data. Results are shown as model averages of cumulative lifetime outcomes per 1000 women screened across Model E and Model W-H. MMG=Mammography; MRI=Magnetic resonance imaging. In all strategies, MMG is performed annually from ages 40-74; MRI varies in start age by strategy.

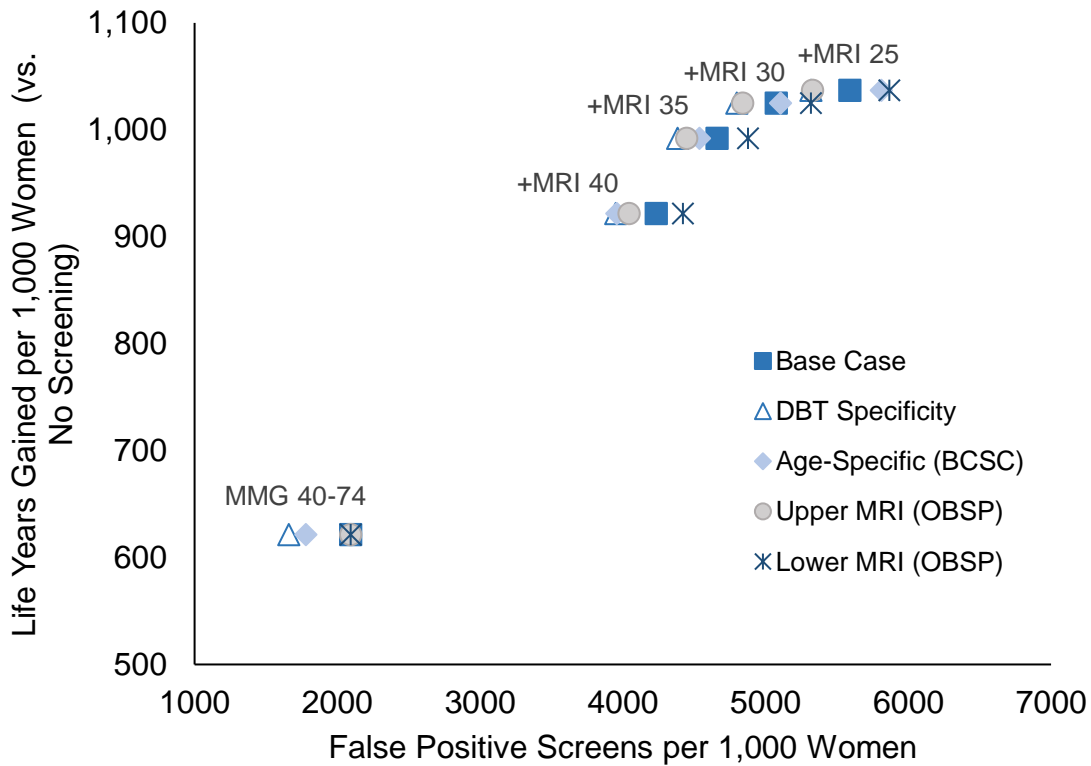

## **eAppendix.** Additional Funding and Acknowledgements for CARRIERS

### **FUNDING/SUPPORT**

Additional support for the contributing studies was provided by NIH awards U01CA164974, R01CA098663, R01CA100598, R01CA185623, P01CA151135, R01 CA097396, P30CA16056, U01CA164973, U01CA164920, R01CA204819, K24CA194251 and K24CA194251-04S1, UL1TR002373, P30CA014520, U01CA82004, U01CA199277, P30CA033572, P30CA023100, UM1CA164917, R01CA077398, R01CA047147, R01CA067264, UM1CA186107, P01CA87969, R01CA49449, U01CA176726, R01CA58860, U01 CA58860, K07CA92044 and R01 CA67262; NHLBI contracts (HHSN268201600018C, HHSN268201600001C, HHSN268201600002C, HHSN268201600003C, and HHSN268201600004C); NIEHS intramural awards (Z01-ES044005, Z01-ES049033 and Z01-ES102245); American Cancer Society; Susan G Komen for the Cure (JRP, SMD), Breast Cancer Research Foundation (FJC, CBA, JNW, SMD, KLN), Karin Grunebaum Cancer Research Foundation (JRP), the University of Wisconsin-Madison Office of the Vice Chancellor for Research and Graduate Education (ESB), California Breast Cancer Act of 1993, the California Breast Cancer Research Fund (contract 97-10500), California Department of Public Health, and the Lon V Smith Foundation [LVS39420]. The content is solely the responsibility of the authors and does not necessarily represent the official views of the National Cancer Institute or the National Institutes of Health.

### **ACKNOWLEDGEMENTS**

**California Teachers Study:** The collection of cancer incidence data used in the California Teachers Study was supported by the California Department of Public Health pursuant to California Health and Safety Code Section 103885; Centers for Disease Control and Prevention's National Program of Cancer Registries, under cooperative agreement 5NU58DP006344; the National Cancer Institute's Surveillance, Epidemiology and End Results Program under contract HHSN261201800032I awarded to the University of California, San Francisco, contract HHSN261201800015I awarded to the University of Southern California, and contract HHSN261201800009I awarded to the Public Health Institute. The opinions, findings, and conclusions expressed herein are those of the author(s) and do not necessarily reflect the official views of the State of California, Department of Public Health, the National Cancer Institute, the National Institutes of Health, the Centers for Disease Control and Prevention or their Contractors and Subcontractors, or the Regents of the University of California, or any of its programs.

The authors would like to thank the California Teachers Study Steering Committee that is responsible for the formation and maintenance of the Study within which this research was conducted. A full list of California Teachers Study team members is available at <https://www.calteachersstudy.org/team>.

**WHI investigators:** The authors thank the WHI investigators and staff for their dedication, and the study participants for making the program possible. A full listing of WHI investigators can be found at: <https://www-who.org.s3.us-west-2.amazonaws.com/wp-content/uploads/WHI-Investigator-Long-List.pdf>

**Program Office:** (National Heart, Lung, and Blood Institute, Bethesda, Maryland) Jacques Rossouw, Shari Ludlam, Joan McGowan, Leslie Ford, and Nancy Geller

**Clinical Coordinating Center:** (Fred Hutchinson Cancer Research Center, Seattle, WA) Garnet Anderson, Ross Prentice, Andrea LaCroix, and Charles Kooperberg

**Investigators and Academic Centers:** (Brigham and Women's Hospital, Harvard Medical School, Boston, MA) JoAnn E. Manson; (MedStar Health Research Institute/Howard University, Washington, DC) Barbara V. Howard; (Stanford Prevention Research Center, Stanford, CA) Marcia L. Stefanick; (The Ohio State University, Columbus, OH) Rebecca Jackson; (University of Arizona, Tucson/Phoenix, AZ) Cynthia A. Thomson; (University at Buffalo, Buffalo, NY) Jean Wactawski-Wende; (University of Florida, Gainesville/Jacksonville, FL) Marian Limacher; (University of Iowa, Iowa City/Davenport, IA) Jennifer Robinson; (University of Pittsburgh, Pittsburgh, PA) Lewis Kuller; (Wake Forest University School of Medicine, Winston-Salem, NC) Sally Shumaker; (University of Nevada, Reno, NV) Robert Brunner

Women's Health Initiative Memory Study: (Wake Forest University School of Medicine, Winston-Salem, NC)  
Mark Espeland

**NHS:** The authors would like to thank the participants and staff of the NHS for their valuable contributions as well as the following state cancer registries for their help: AL, AZ, AR, CA, CO, CT, DE, FL, GA, ID, IL, IN, IA, KY, LA, ME, MD, MA, MI, NE, NH, NJ, NY, NC, ND, OH, OK, OR, PA, RI, SC, TN, TX, VA, WA, WY.
